# Supplementary material
Source: PubMed Central journal article supplement (PMC2386928)
Supplement: R700052200_1.pdf [file R700052200_1.pdf]

Supplemental Table 1. **Mechanisms of Soluble Cytokine Receptor Generation**

|                                                        | <u>Mechanism</u> | <u>Sheddase</u>  | <u>Reference</u> |
|--------------------------------------------------------|------------------|------------------|------------------|
| <b><u>TNF Receptor Superfamily</u></b>                 |                  |                  |                  |
| TNFRSF1A (TNFR1)                                       | RS               | TACE             | (31,72)          |
|                                                        | EX               | NE               | (40)<br>(62,67)  |
| TNFRSF1B (TNFR2)                                       | RS               | TACE             | (10)             |
|                                                        | AS               | NE               | (40)             |
|                                                        | EX               |                  | (41)<br>(67)     |
| TNFRSF5 (CD40)                                         | RS               | TACE             | (3,8,9)          |
| TNFRSF6 (Fas, CD95)                                    | AS               |                  | (8)              |
| TNFRSF6B (Decoy Receptor 3, DcR3)                      | BP               |                  | (8)              |
| TNFRSF8 (CD30)                                         | RS               | TACE<br>ADAM10   | (3,8,9)<br>(33)  |
| TNFRSF9 (4-1BB, CD137)                                 | AS               |                  | (8)              |
| TNFRSF11B (Osteoprotegerin)                            | BP               |                  | (8)              |
| TNFRSF16 (p75 Neurotrophin Receptor)                   | RS               | TACE             | (8)              |
| <b><u>IL-1R/TLR Superfamily</u></b>                    |                  |                  |                  |
| IL-1 Receptor, type II (IL-1RII)                       | RS               | TACE<br>BACE 1,2 | (3,8,9)<br>(37)  |
|                                                        | AS               |                  | (8)              |
| IL-1 Receptor Accessory Protein (IL-1RAcP)             | AS               |                  | (8)              |
| IL-1 Receptor-like 1 (ST2)                             | BP               |                  | (55)             |
| IL-18 Binding Protein (IL-18BP)                        | BP               |                  | (8,50-52)        |
| <b><u>Class I Cytokine Receptor Superfamily</u></b>    |                  |                  |                  |
| Ciliary Neurotrophic Factor Receptor, $\alpha$ (CNTFR) | RS               | PI-PLC           | (8)              |
| Cytokine-like Factor-1 (CLF)                           | BP               |                  | (56)             |
| Erythropoietin Receptor (EPOR)                         | AS               |                  | (8)              |
| gp130                                                  | AS               |                  | (8)              |
| GM-CSF Receptor, $\alpha$ (CSF2RA, CSF2R $\alpha$ )    | AS               |                  | (8)              |
| Growth Hormone Receptor (GHR)                          | RS               | TACE             | (3,8)            |
| IL-2 Receptor, $\alpha$                                | RS               | MMP9             | (39)             |
|                                                        |                  | NE               | (73)             |
|                                                        |                  | PR3              | (73)             |
| IL-4 Receptor, $\alpha$                                | AS               |                  | (8)              |

|                                                              |         |                        |                        |
|--------------------------------------------------------------|---------|------------------------|------------------------|
| IL-5 Receptor, $\alpha$                                      | AS      |                        | (8)                    |
| IL-6 Receptor, $\alpha$                                      | RS      | TACE<br>ADAM10<br>CTSG | (3,8,9)<br>(8)<br>(73) |
|                                                              |         | AS                     | (8)                    |
| IL-7 Receptor, $\alpha$                                      | AS      |                        | (8)                    |
| IL-9 Receptor, $\alpha$                                      | AS      |                        | (8)                    |
| IL-15 Receptor, $\alpha$                                     | RS      | TACE                   | (3,8,9)                |
|                                                              | AS      |                        | (42)                   |
| Leukemia Inhibitory Factor Receptor, $\alpha$                | AS      |                        | (8)                    |
| Oncostatin M Receptor                                        | AS      |                        | (45)                   |
| <b><u>Class II Cytokine Receptor Superfamily</u></b>         |         |                        |                        |
| Inteferon Receptor (IFNAR1)                                  | AS      |                        | (8)                    |
| IL-22 Receptor, $\alpha$ 2 (IL22RA2, IL-22BP)                | BP      |                        | (8)                    |
| <b><u>IL-17 Receptor Family</u></b>                          |         |                        |                        |
| IL-17 Receptor                                               | AS      |                        | (8)                    |
| <b><u>Receptor Tyrosine Kinases</u></b>                      |         |                        |                        |
| CSFR1 (M-CSFR)                                               | RS      | TACE                   | (3,8)                  |
| Epidermal Growth Factor Receptor (EGFR, erbB1)               | EX      |                        | (68)                   |
| erbB2/HER2                                                   | RS      | ADAM10                 | (74)                   |
| erbB4/HER4                                                   | RS      | TACE                   | (3,8)                  |
| Flt1 (fms-like tyrosine kinase, VEGF receptor 1)             | AS      |                        | (75)                   |
| c-Kit (CD117)                                                | RS      | TACE                   | (3,8)                  |
| trkA (NTRK1, neurotrophic tyrosine kinase, receptor, type 1) | RS      | TACE                   | (3)                    |
| <b><u>TGF-<math>\beta</math> Receptor Family</u></b>         |         |                        |                        |
| TGF- $\beta$ receptor I (Activin Receptor-like Kinase 5)     | AS      |                        | (8)                    |
| TGF- $\beta$ Receptor III (Betaglycan)                       | RS      | MT1-MMP<br>MT3-MMP     | (8)                    |
| Activin Receptor-like Kinase 7                               | AS      |                        | (8)                    |
| Endoglin (CD105)                                             | Unknown |                        | (76)                   |
| <b><u>Chemokine Receptors</u></b>                            |         |                        |                        |
| CCR6                                                         | MV      |                        | (70)                   |
| CX3CR1                                                       | MV      |                        | (70)                   |
| <b><u>Immunoglobulin Receptors</u></b>                       |         |                        |                        |
| CD23 (low-affinity IgE receptor)                             | RS      | ADAM10                 | (35)                   |

Abbreviations: AS, alternative splicing; BP, secreted cytokine binding protein; CTSG, cathepsin G; EX, exosome or exosome-like vesicle; MMP9, matrix metalloproteinase 9; MT-MMP, membrane-type-matrix metalloproteinase; MV, microvesicle; NE, neutrophil elastase; PI-PLC, phosphatidylinositol-specific phospholipase C; PR3, proteinase 3; RS, receptor sheddase-mediated ectodomain cleavage.

### Additional References for Supplemental Table 1

72. Reddy, P., Slack, J. L., Davis, R., Cerretti, D. P., Kozlosky, C. J., Blanton, R. A., Shows, D., Peschon, J. J., and Black, R. A. (2000) *J Biol Chem* **275**(19), 14608-14614
73. Bank, U., Reinhold, D., Schneemilch, C., Kunz, D., Synowitz, H. J., and Ansorge, S. (1999) *J Interferon Cytokine Res* **19**(11), 1277-1287
74. Liu, P. C., Liu, X., Li, Y., Covington, M., Wynn, R., Huber, R., Hillman, M., Yang, G., Ellis, D., Marando, C., Katiyar, K., Bradley, J., Abremski, K., Stow, M., Rupar, M., Zhuo, J., Li, Y. L., Lin, Q., Burns, D., Xu, M., Zhang, C., Qian, D. Q., He, C., Sharief, V., Weng, L., Agrios, C., Shi, E., Metcalf, B., Newton, R., Friedman, S., Yao, W., Scherle, P., Hollis, G., and Burn, T. C. (2006) *Cancer Biol Ther* **5**(6), 657-664
75. Kendall, R. L., Wang, G., and Thomas, K. A. (1996) *Biochem Biophys Res Commun* **226**(2), 324-328
76. Venkatesha, S., Toporsian, M., Lam, C., Hanai, J., Mammoto, T., Kim, Y. M., Bdolah, Y., Lim, K. H., Yuan, H. T., Libermann, T. A., Stillman, I. E., Roberts, D., D'Amore, P. A., Epstein, F. H., Sellke, F. W., Romero, R., Sukhatme, V. P., Letarte, M., and Karumanchi, S. A. (2006) *Nat Med* **12**(6), 642-649
